# Supplementary material for: Cumulative Exposure to Frequent Intradialytic Hypotension Associates With New-Onset Dementia Among Elderly Hemodialysis Patients
Source: PubMed Central journal article supplement — Kidney Int Rep. 2019 Jan 14;4(4):603–6. doi: 10.1016/j.ekir.2019.01.001 (PMC6451081; doi:10.1016/j.ekir.2019.01.001), 2019-01-14
Supplement: mmc4.pdf [file mmc4.pdf]

**Supplemental Table S2. Complete list of study cohort baseline characteristics**

| <b>Characteristic</b>                                                     | <b>Total study population (N = 31,055)</b> |
|---------------------------------------------------------------------------|--------------------------------------------|
| <b>Age at dialysis initiation (years)</b>                                 | 76.0 ± 6.6                                 |
| <b>Female</b>                                                             | 14,359 (46.2%)                             |
| <b>Race</b>                                                               |                                            |
| Black                                                                     | 6,179 (19.9%)                              |
| White                                                                     | 23,356 (75.2%)                             |
| Other                                                                     | 1,520 (4.9%)                               |
| <b>Hispanic</b>                                                           | 2,705 (8.7%)                               |
| <b>GFR<sup>a</sup> at dialysis initiation (mL/min/1.73 m<sup>2</sup>)</b> | 9.8 ± 5.2                                  |
| <b>Cause of end-stage kidney disease</b>                                  |                                            |
| Diabetes                                                                  | 13,565 (43.7%)                             |
| Hypertension                                                              | 11,636 (37.5%)                             |
| Glomerular disease                                                        | 1,742 (5.6%)                               |
| Other                                                                     | 4,112 (13.2%)                              |
| <b>Inpatient dialysis initiation</b>                                      | 13,054 (42.0%)                             |
| <b>Vascular access</b>                                                    |                                            |
| Catheter                                                                  | 22,398 (72.1%)                             |
| Fistula                                                                   | 6,580 (21.2%)                              |
| Graft                                                                     | 2,077 (6.7%)                               |
| <b>Current smoker at dialysis initiation</b>                              | 1,090 (3.5%)                               |
| <b>Employment status at dialysis initiation</b>                           |                                            |
| Employed                                                                  | 648 (2.1%)                                 |
| Homemaker                                                                 | 1,251 (4.0%)                               |
| Retired                                                                   | 26,192 (84.3%)                             |
| Unemployed                                                                | 2,964 (9.5%)                               |
| <b>Body mass index</b>                                                    |                                            |
| ≤ 18.4 kg/m <sup>2</sup>                                                  | 1,044 (3.4%)                               |
| 18.5 – 24.9 kg/m <sup>2</sup>                                             | 10,318 (33.2%)                             |
| 25.0 – 29.9 kg/m <sup>2</sup>                                             | 9,592 (30.9%)                              |
| ≥ 30 kg/m <sup>2</sup>                                                    | 10,101 (32.5%)                             |
| <b>Arrhythmia or conduction disorder</b>                                  | 12,393 (39.9%)                             |
| <b>Anxiety</b>                                                            | 1,545 (5.0%)                               |
| <b>Cancer</b>                                                             | 6,251 (20.1%)                              |
| <b>COPD or asthma</b>                                                     | 9,579 (30.8%)                              |
| <b>Depression</b>                                                         | 3,071 (9.9%)                               |
| <b>Diabetes</b>                                                           | 20,379 (65.6%)                             |

|                                                                                |                |
|--------------------------------------------------------------------------------|----------------|
| <b>Dyslipidemia</b>                                                            | 9,972 (32.1%)  |
| <b>Hearing loss</b>                                                            | 803 (2.6%)     |
| <b>Heart failure</b>                                                           | 18,370 (59.2%) |
| <b>Ischemic heart disease</b>                                                  | 17,398 (56.0%) |
| <b>Liver disease</b>                                                           | 648 (2.1%)     |
| <b>Peripheral arterial disease</b>                                             | 9,046 (29.1%)  |
| <b>Stroke</b>                                                                  | 5,834 (18.8%)  |
| <b>Valvular disease</b>                                                        | 2,464 (7.9%)   |
| <b>History of non-compliance</b>                                               | 913 (2.9%)     |
| <b>Equilibrated Kt/V &lt; 1.2</b>                                              | 1,937 (6.2%)   |
| <b>Albumin<sup>c</sup></b>                                                     |                |
| ≤ 2.9 g/L                                                                      | 3,327 (10.7%)  |
| 3.0 – 3.4 g/L                                                                  | 9,017 (29.0%)  |
| 3.5 – 3.9 g/L                                                                  | 13,440 (43.3%) |
| ≥ 4.0 g/L                                                                      | 5,271 (17.0%)  |
| <b>Phosphorous<sup>c</sup></b>                                                 |                |
| ≤ 3.4 mg/dL                                                                    | 6,976 (22.5%)  |
| 3.5 – 5.5 mg/dL                                                                | 19,911 (64.1%) |
| ≥ 5.6 mg/dL                                                                    | 4,168 (13.4%)  |
| <b>Pre-dialysis systolic blood pressure</b>                                    |                |
| ≤ 130 mmHg                                                                     | 8,475 (27.3%)  |
| 131 – 150 mmHg                                                                 | 12,240 (39.4%) |
| 151 – 170 mmHg                                                                 | 7,736 (24.9%)  |
| ≥ 171 mmHg                                                                     | 2,604 (8.4%)   |
| <b>Under the care of a nephrologist at the time of dialysis initiation</b>     |                |
| Yes                                                                            | 21,074 (67.9%) |
| No                                                                             | 6,470 (20.8%)  |
| Unknown                                                                        | 3,511 (11.3%)  |
| <b>Under the care of a kidney dietician at the time of dialysis initiation</b> |                |
| Yes                                                                            | 2,571 (8.3%)   |
| No                                                                             | 22,054 (71.0%) |
| Unknown                                                                        | 6,430 (20.7%)  |
| <b>History of needing assistance with daily activities</b>                     | 3,072 (9.9%)   |
| <b>History of an inability to ambulate</b>                                     | 1,241 (4.0%)   |
| <b>Number of hospitalizations in the year prior to dialysis initiation</b>     |                |

|                                                                                                |                |
|------------------------------------------------------------------------------------------------|----------------|
| 0                                                                                              | 12,774 (41.1%) |
| 1                                                                                              | 8,440 (27.2%)  |
| 2                                                                                              | 4,537 (14.6%)  |
| ≥ 3                                                                                            | 5,304 (17.1%)  |
| <b>Number of emergency department visits<br/>in the year prior to dialysis initiation</b>      |                |
| 0                                                                                              | 7,853 (25.3%)  |
| 1                                                                                              | 8,841 (28.5%)  |
| 2                                                                                              | 5,694 (18.3%)  |
| ≥ 3                                                                                            | 8,667 (27.9%)  |
| <b>Had ≥ 1 skilled nursing facility admission<br/>in the year prior to dialysis initiation</b> |                |
|                                                                                                | 2,964 (9.5%)   |

Values are given as number (percent) for categorical variables and as mean ± standard deviation for continuous variables. Baseline covariates, including demographics, comorbid conditions and health care utilization metrics were obtained in the 365 days preceding dialysis initiation. Baseline laboratory and dialysis treatment-related covariates were obtained in the 30 days immediately after dialysis initiation. Covariate definitions are provided in Supplemental Table S4.

<sup>a</sup> Estimated using the CKD-EPI equation.

Abbreviations: CKD-EPI, Chronic Kidney Disease Epidemiology Collaboration; GFR, glomerular filtration rate
