# Supplementary material for: Cumulative Exposure to Frequent Intradialytic Hypotension Associates With New-Onset Dementia Among Elderly Hemodialysis Patients
Source: PubMed Central journal article supplement — Kidney Int Rep. 2019 Jan 14;4(4):603–6. doi: 10.1016/j.ekir.2019.01.001 (PMC6451081; doi:10.1016/j.ekir.2019.01.001), 2019-01-14
Supplement: mmc5.pdf [file mmc5.pdf]

**Supplemental Table S3. Outcome and competing event definitions**

| <b>Study outcome</b>  |                           |                                                                                                                                                                                                                |
|-----------------------|---------------------------|----------------------------------------------------------------------------------------------------------------------------------------------------------------------------------------------------------------|
| <b><u>Outcome</u></b> | <b><u>Data source</u></b> | <b><u>Definition</u></b>                                                                                                                                                                                       |
| All-cause dementia    | Medicare Part A/B claims  | A healthcare encounter with an ICD-9 discharge diagnosis code for dementia (331.0, 331.1, 331.2, 331.7, 290.0, 290.1, 290.2, 1, 290.3, 290.4, 294.0, 294.1, 294.2, 294.8, 797) located in any billing position |

  

| <b>Competing event</b> |                                                                 |                          |
|------------------------|-----------------------------------------------------------------|--------------------------|
| <b><u>Event</u></b>    | <b><u>Data source</u></b>                                       | <b><u>Definition</u></b> |
| All-cause death        | End-stage Renal Disease Death Notification Form (CMS Form 2746) | Death due to any cause   |

Abbreviations: CMS, Centers for Medicare & Medicaid Services; ICD-9, International Classification of Diseases, Ninth Revision.
